# Supplementary material for: Large-scale transcriptome-wide profiling of microRNAs in human placenta and maternal plasma at early to mid gestation
Source: medRxiv preprint, doi:10.1101/2020.08.19.20177873, version 2 (2020-10-13)
Supplement: Additional file 2 [file 177873_file09.docx]

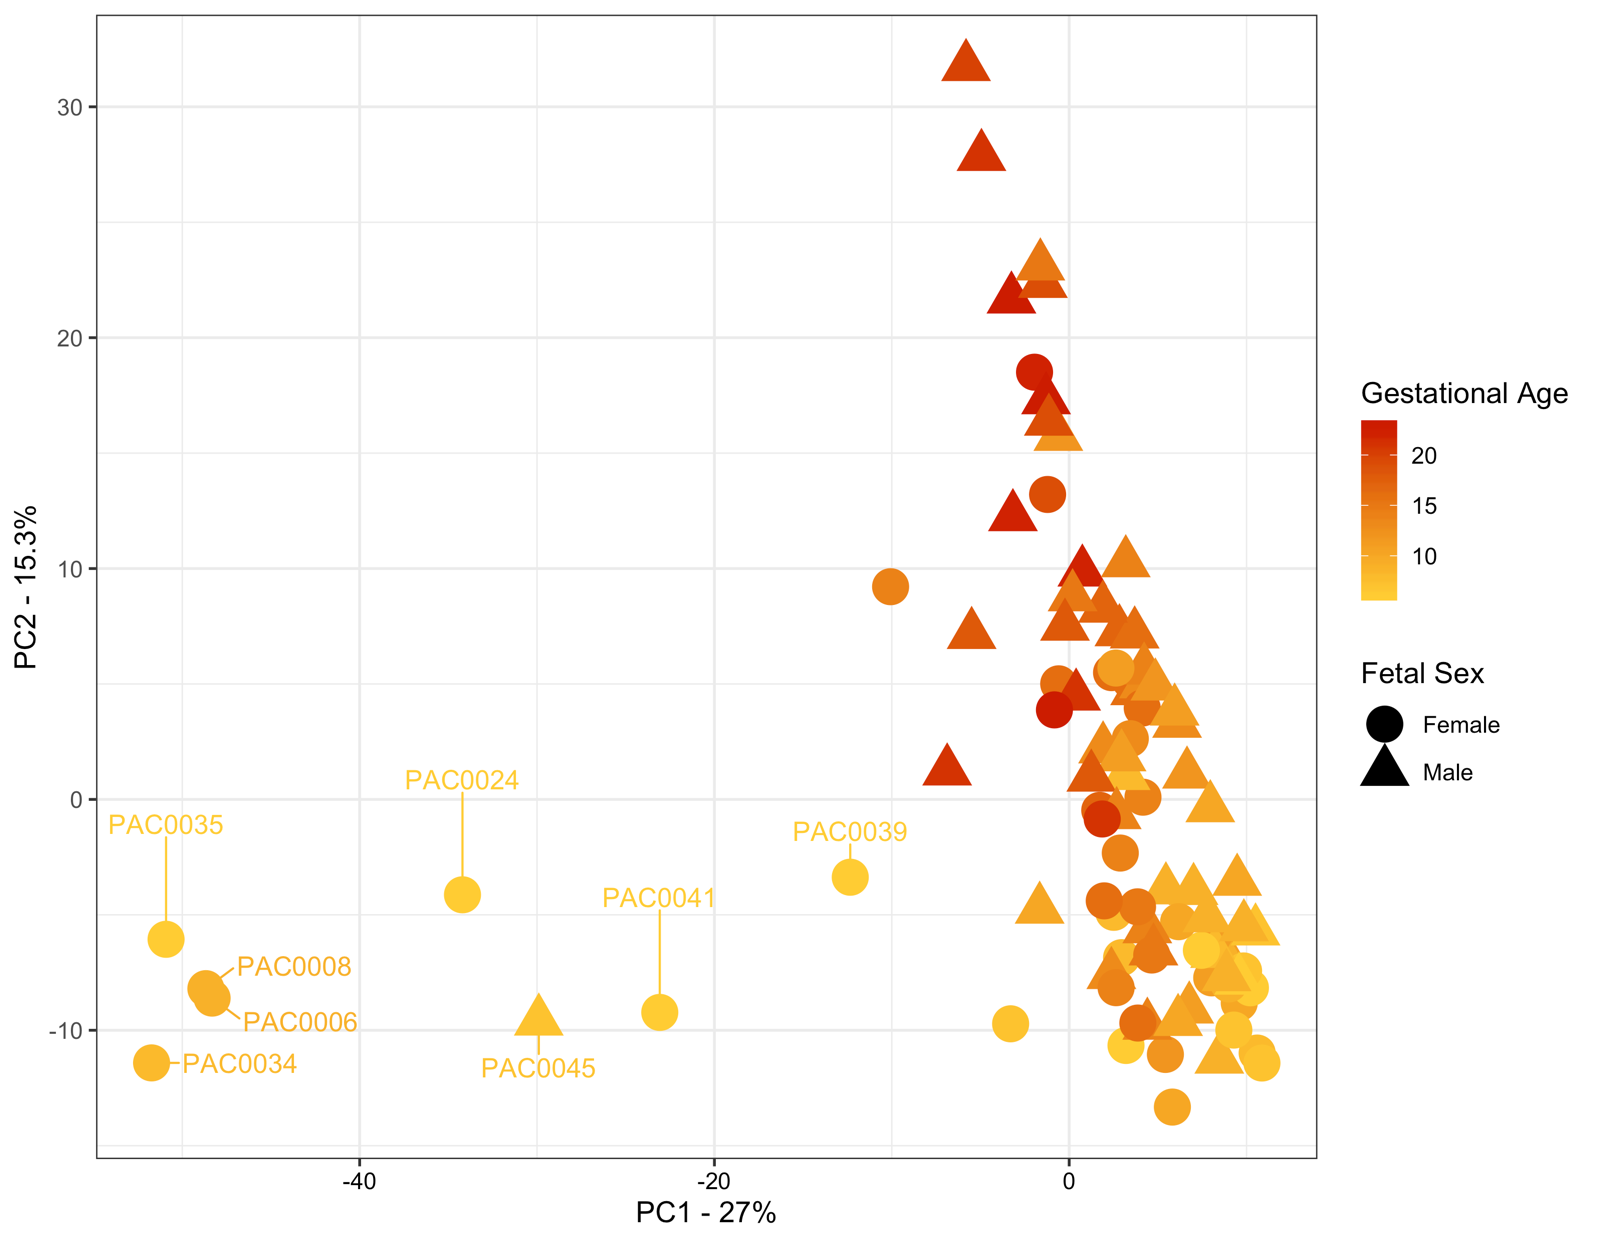


**Additional File 2: Figure S1.** Using principal component analyses of the miRNA-Seq data from 94 placenta samples, we identified 8 samples (named) that segregated from the remaining 86 samples. This separation on PC1 is most likely due to the presence of surrounding non-villous tissue.


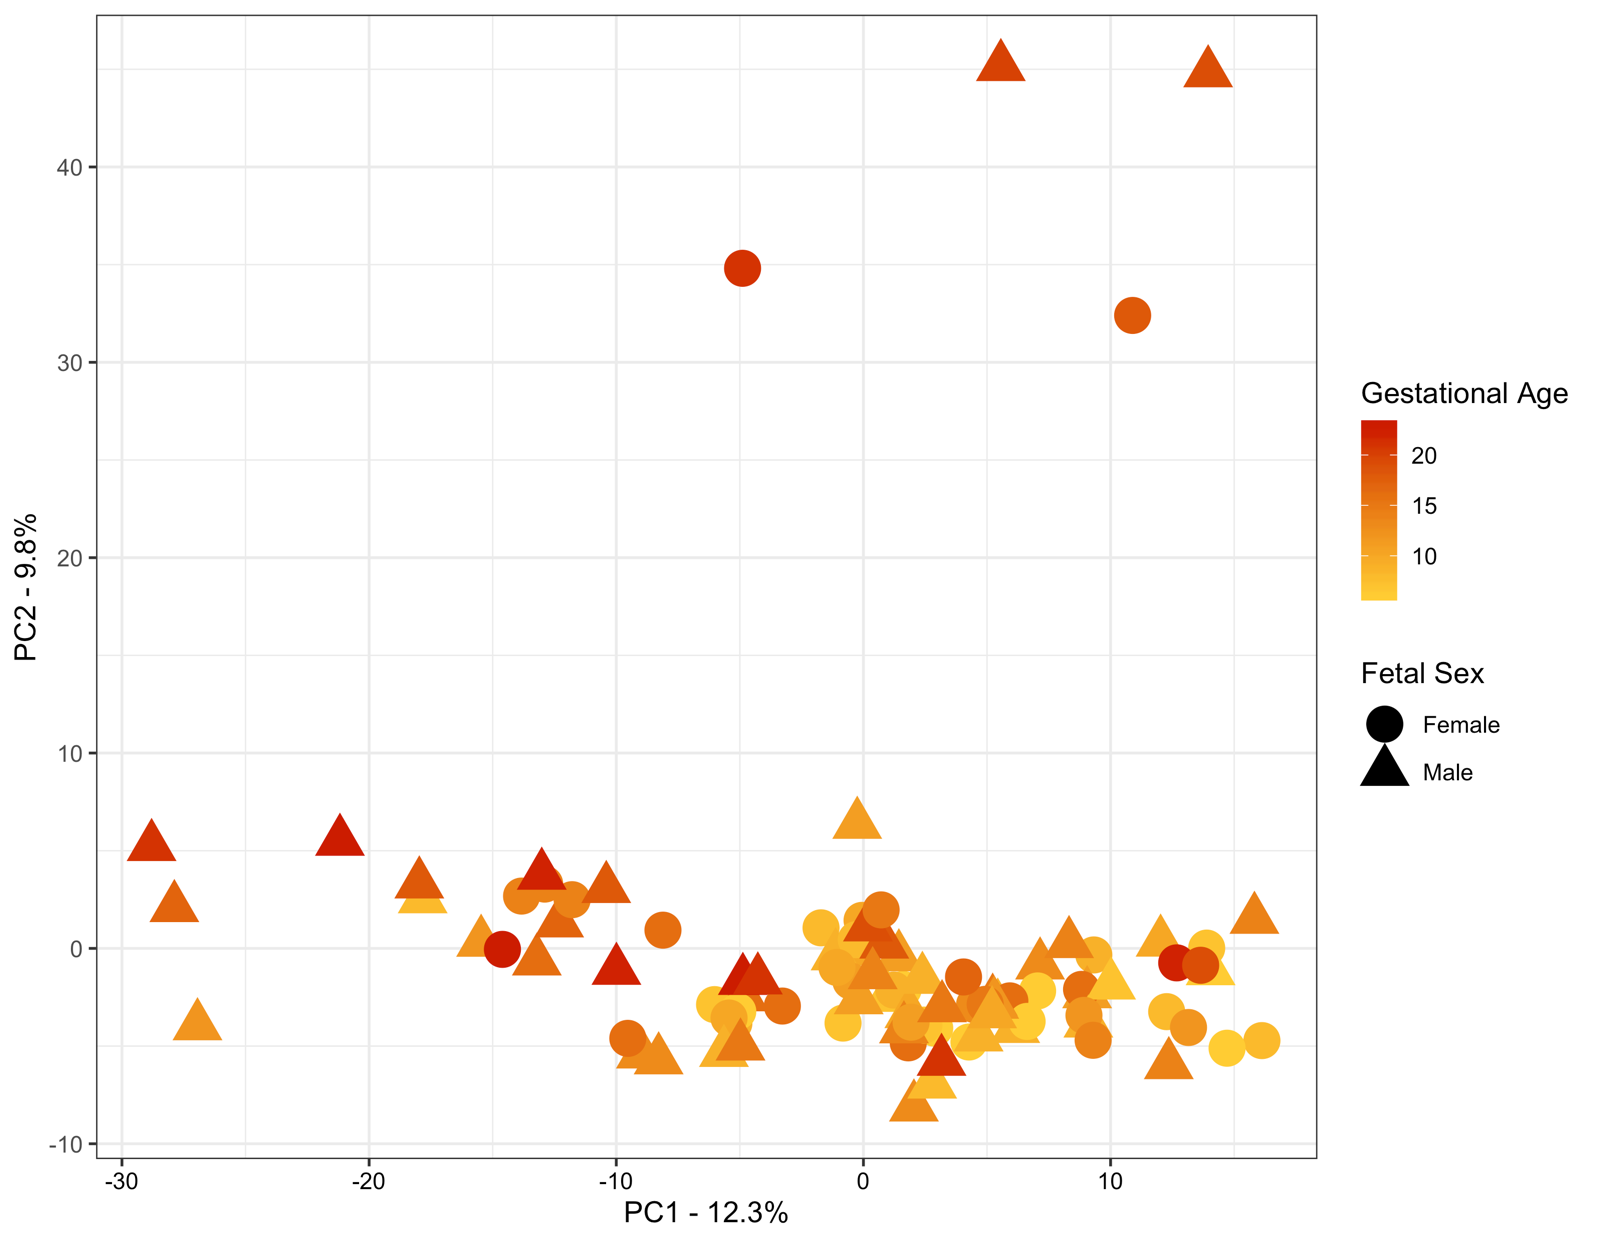


**Additional File 2: Figure S2.** The PCA plot of batch corrected data shows no gestational age gradient for maternal plasma from 6-23 weeks’ gestation. The four samples in the upper right quadrant were sequenced in the same sequencing run and may represent a technical artefact in line with previous difficulties in plasma sequencing but have not been removed from further analysis.


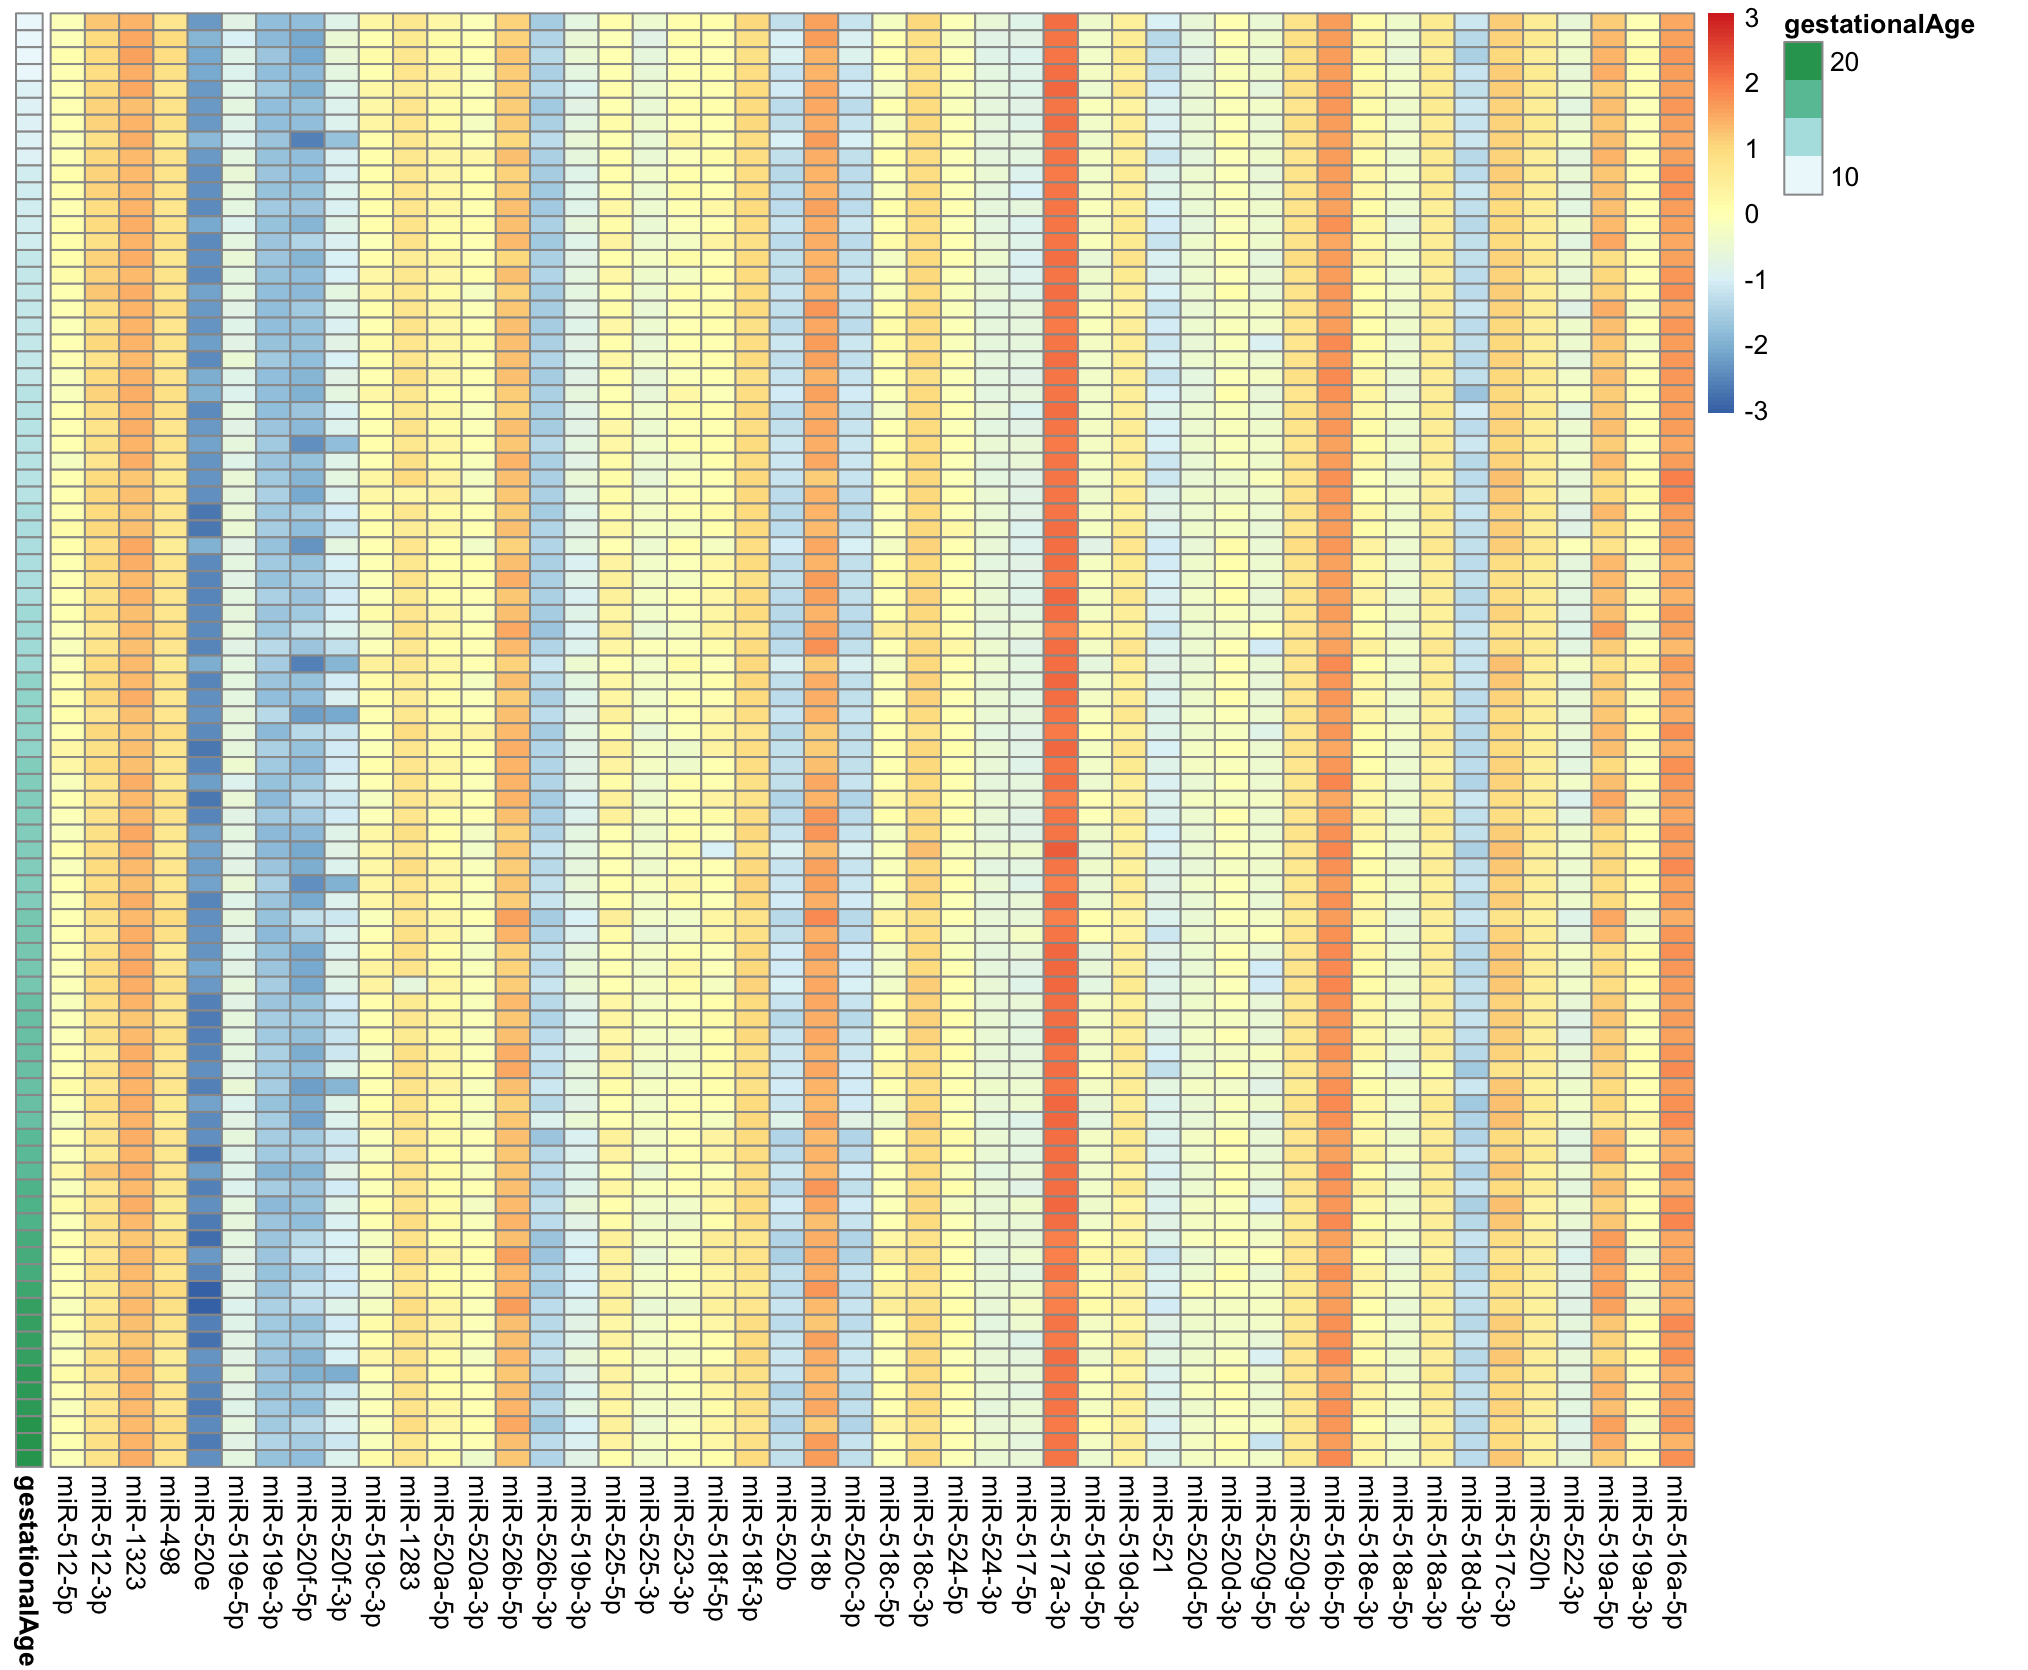


**Additional File 2: Figure S3.** Heatmap of C19MC cluster members plotted from 5` (left) to 3` (right), and from early (top) to later (bottom) gestation clearly identifies different expression levels for the polycistronic members of this cluster.
